# Supplementary material for: Next-generation DNA sequencing identifies novel gene variants and pathways involved in specific language impairment
Source: PubMed Central journal article supplement (PMC5404330; doi:10.1038/srep46105), 2017-04-25
Supplement: srep46105-s1.pdf [file srep46105-s1.pdf]

## **Next-generation sequencing identifies novel gene variants and pathways involved in specific language impairment**

Xiaowei Sylvia Chen, Rose H. Reader, Alexander Hoischen, Joris A. Veltman, Nuala H. Simpson, Clyde Francks, Dianne F. Newbury, Simon E. Fisher

### **SUPPLEMENTARY FIGURES**

**SUPPLEMENTARY FIGURE S1** - Coverage versus read depth of 43 SLI samples

**SUPPLEMENTARY FIGURE S2** - Rare and Novel Variants in Candidate Genes

**SUPPLEMENTARY FIGURE S3** - STOP-gain variants identified in SLIC probands

**SUPPLEMENTARY FIGURE S4** - Probands with multiple novel or rare variants in one gene

### **SUPPLEMENTARY TABLES – please see excel file**

**SUPPLEMENTARY TABLE S1** - Sequence metrics for 43 SLI samples

**SUPPLEMENTARY TABLE S2** - Number of variants at each filtering stage

**SUPPLEMENTARY TABLE S3** - Numbers of rare and novel variants per individual

**SUPPLEMENTARY TABLE S4** - Coding and splice-site variants in candidate genes

**SUPPLEMENTARY TABLE S5** - Protein interaction pathways shared by multiple SLI probands

**SUPPLEMENTARY TABLE S6** - Variants included in GO analyses of transcripts carrying high priority rare or novel coding SNVs between and across probands

**SUPPLEMENTARY TABLE S7** - Variants included in GO analyses of transcripts carrying novel coding SNVs across probands

**SUPPLEMENTARY TABLE S8** - Variants included in GO analyses of transcripts carrying rare (<1%) coding SNVs across probands

**SUPPLEMENTARY TABLE S9** - Variants included in GO analyses of transcripts carrying coding SNVs with expected frequencies between 1% and 5% across probands

**SUPPLEMENTARY FIGURE S1 - Coverage versus read depth of 43 SLI samples**

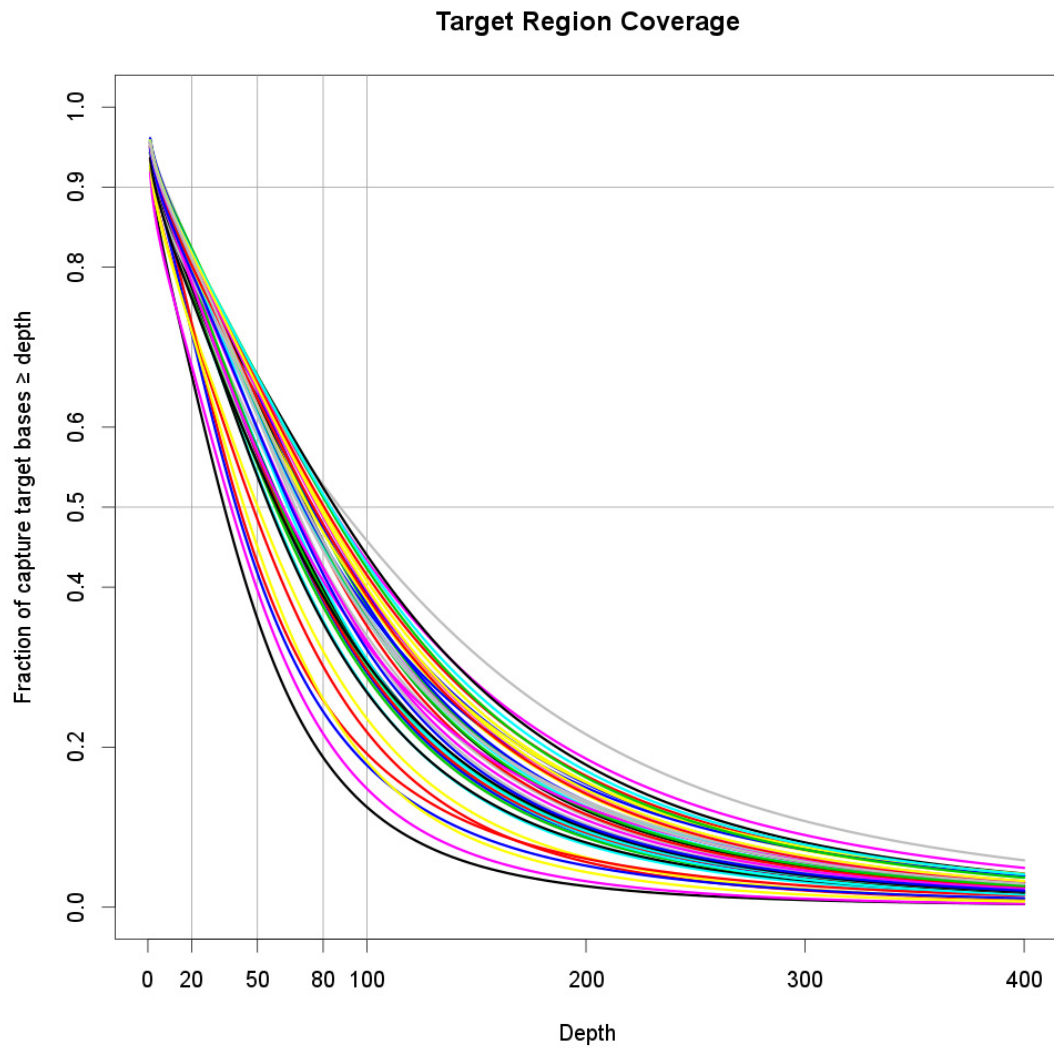

**SUPPLEMENTARY FIGURE S2 - Rare and Novel Variants in Candidate Genes**

Variants are shown in map order with '+' denoting variant carrier. Variants of putative significance are shown in Figure 1 of the main manuscript. Variants that co-occur with other variants of putative significance are shown in Figure 3 of the main manuscript.

**chr2: 125504881, Proband 39 – CNTNAP5, V717A**

Variant was not genotyped in family (EVS\_EA>1%)

**chr3:78766524, Proband 17 – ROBO1, V234A**

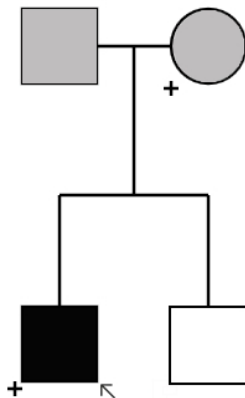

|             | Father | Mother | Proband   | Sib       |
|-------------|--------|--------|-----------|-----------|
| <b>Gtyp</b> | AA     | AG     | AG        | AA        |
| <b>ELS</b>  |        |        | <b>50</b> | 80        |
| <b>RLS</b>  |        |        | 80        | 103       |
| <b>NWR</b>  | 55     | 84     | 87        | <b>58</b> |
| <b>VIQ</b>  |        |        | NA        | NA        |
| <b>PIQ</b>  |        |        | 110       | 89        |

**chr7:69364311, Proband 19 – AUTS2, R117C**

Pedigree shown in Figure 3

**chr7:146829358, Proband 40 – CNTNAP2, V369L**

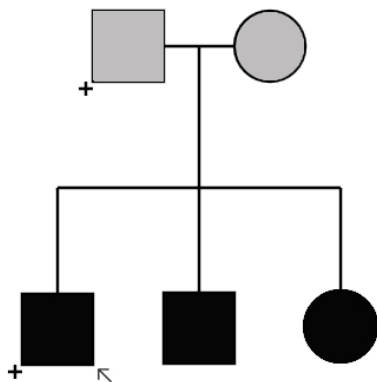

|             | Father | Mother | Proband   | Sib1      | Sib2      |
|-------------|--------|--------|-----------|-----------|-----------|
| <b>Gtyp</b> | GT     | GG     | GT        | GG        | GG        |
| <b>ELS</b>  |        |        | <b>72</b> | 80        | <b>65</b> |
| <b>RLS</b>  |        |        | 99        | <b>74</b> | 69        |
| <b>NWR</b>  | 88     | 78     | 85        | 89        | 92        |
| <b>VIQ</b>  |        |        | 99        | 101       | 93        |
| <b>PIQ</b>  |        |        | 104       | 121       | <b>67</b> |

Both parents self-report a history of speech and language difficulties

**chr12: 1137072, Proband 23 – ERC1, M1I**

Pedigree shown in Figure 1

**SUPPLEMENTARY FIGURE S2 (cont.) - Rare and Novel Variants in Candidate Genes**

**chr12:13715865, Proband 25 – *GRIN2B*, G1436A**

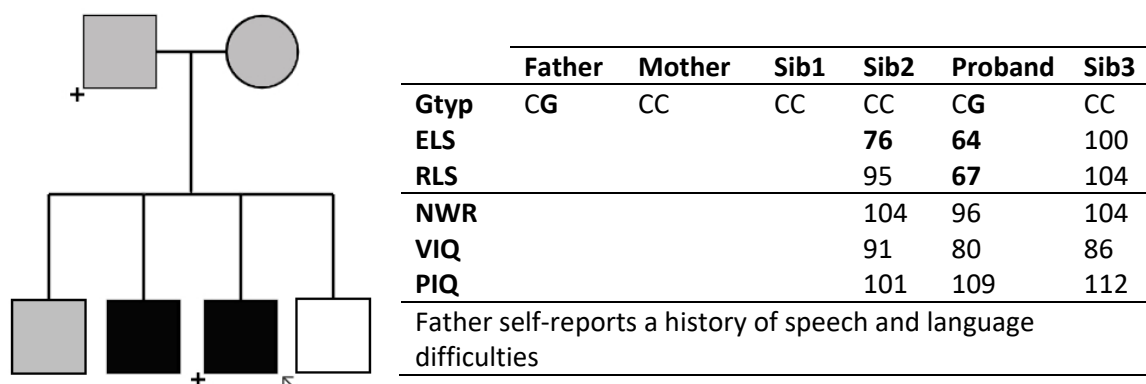

**chr15:48063365, Proband 30 – *SEMA6D*, H807D**

Pedigree shown in Figure 3

**chr16:9916226, Proband 4 – *GRIN2A*, G688A**

Pedigree shown in Figure 1

**chr16:84438827, Proband 35 – *ATP2C2*, V102M**

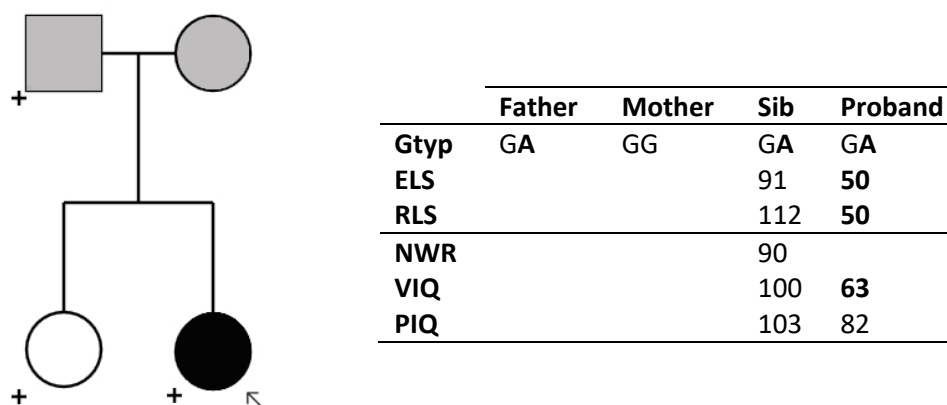

**chr16:84494315, Probands 27, 36 & 39 – *ATP2C2*, R646W**

Variant was not genotyped in families (EVS\_EA>1%)

**chrX:99922289, Proband 41 – *SRPX2*, N327S**

Pedigree shown in Figure 1

**SUPPLEMENTARY FIGURE S3 - STOP-gain variants identified in SLIC probands**

Variants are shown in map order with '+' denoting variant carrier. Stop-gains that co-segregate with disorder are shown in Figure 2 of the main manuscript. Variants that co-occur with other variants of putative significance are shown in Figure 3 of the main manuscript.

**chr1:158532597, Proband 34 – *OR6P1*, Y266X**

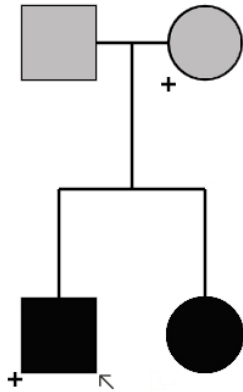

|             | Father | Mother | Proband   | Sib       |
|-------------|--------|--------|-----------|-----------|
| <b>Gtyp</b> | GG     | GT     | GT        | GG        |
| <b>ELS</b>  |        |        | <b>50</b> | <b>50</b> |
| <b>RLS</b>  |        |        | <b>54</b> | <b>50</b> |
| <b>NWR</b>  | 84     | 88     | 102       | <b>62</b> |
| <b>VIQ</b>  |        |        | 83        | <b>69</b> |
| <b>PIQ</b>  |        |        | 80        | 99        |

**chr3:63466576, Proband 30 – *SYNPR*, C31X**

Pedigree shown in Figure 3

**chr8:39847306, Proband 11 – *IDO2*, R219X**

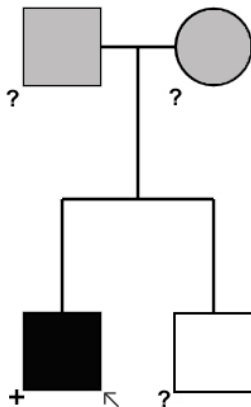

|             | Father | Mother | Proband   | Sib |
|-------------|--------|--------|-----------|-----|
| <b>Gtyp</b> | NA     | NA     | CT        | NA  |
| <b>ELS</b>  |        |        | <b>72</b> |     |
| <b>RLS</b>  |        |        | <b>76</b> |     |
| <b>NWR</b>  |        |        | <b>75</b> |     |
| <b>VIQ</b>  |        |        |           |     |
| <b>PIQ</b>  |        |        | 89        | 89  |

**chr8:107738486, Proband 29 – *OXR1*, W5X**

Pedigree shown in Figure 2

**SUPPLEMENTARY FIGURE S3 (cont.) - STOP-gain variants identified in SLIC probands**

**chr11:1027390, Proband 8 – *MUC6*, C703X**

Pedigree shown in Figure 2

**chr11:6190828, Proband 19 – *OR52B2*, C243X**

Pedigree shown in Figure 3

**chr16:4745030, Proband 9 – *NUDT16L1*, Q186X**

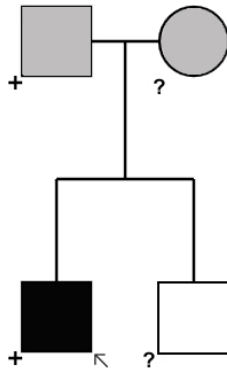

|                                       | Father    | Mother | Proband   | Sib |
|---------------------------------------|-----------|--------|-----------|-----|
| <b>Gtyp</b>                           | CT        | NA     | CT        | NA  |
| <b>ELS</b>                            |           |        | <b>54</b> | 78  |
| <b>RLS</b>                            |           |        | <b>59</b> | 105 |
| <b>NWR</b>                            | <b>64</b> |        | <b>55</b> | 83  |
| <b>VIQ</b>                            |           |        |           |     |
| <b>PIQ</b>                            |           |        | 89        | 125 |
| No sample available for Mother or Sib |           |        |           |     |

**SUPPLEMENTARY FIGURE S4 - Probands with multiple novel or rare variants in one gene**

We focus here on potential compound heterozygotes only. Variants are shown in map order with '-' denoting homozygote wildtype and '+' denoting variant carrier. Pedigrees in which the variants were inherited from opposite parents and co-segregated with disorder in the children are shown in Figure 3 of the main manuscript.

**chr2:32689842&chr2:32740353, Probands 26&42 – *BIRC6*, P1736L&A3622V**

Both variants inherited from single parent

**chr2:167089942&chr2:167094638, Proband 2 – *SCN9A*, L1267V&N1245S**

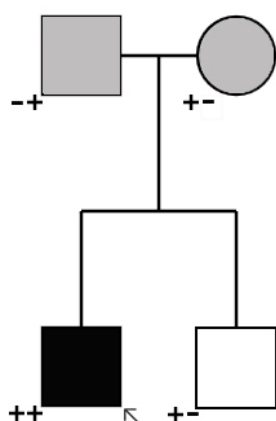

|                | Father | Mother | Proband | Sib |
|----------------|--------|--------|---------|-----|
| chr2:167089942 | GG     | GC     | GC      | GC  |
| chr2:167094638 | TC     | TT     | TC      | TT  |
| ELS            |        |        | 62      | 112 |
| RLS            |        |        | 95      | 101 |
| NWR            | 61     | 74     | 65      | 96  |
| VIQ            |        |        |         |     |
| PIQ            |        |        | 108     | 110 |

**chr3:58104626&chr3:58110119, Proband 40 – *FLNB*, G925C&G1262A**

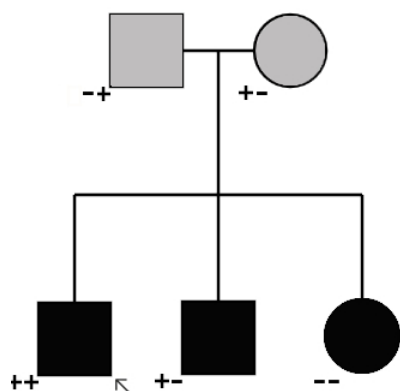

|               | Father | Mother | Proband | Sib1 | Sib2 |
|---------------|--------|--------|---------|------|------|
| chr3:58104626 | GG     | GT     | GT      | GT   | GG   |
| chr3:58110119 | GC     | GG     | GC      | GG   | GG   |
| ELS           |        |        | 72      | 80   | 65   |
| RLS           |        |        | 99      | 74   | 69   |
| NWR           | 88     | 78     | 85      | 89   | 92   |
| VIQ           |        |        | 99      | 101  | 93   |
| PIQ           |        |        | 104     | 121  | 67   |

Both parents self-report a history of speech and language difficulties

**chr11:6190710&chr11:6190828, Proband 19 – *OR52B2*, V283M&C243X**

Pedigree shown in Figure 3

**SUPPLEMENTARY FIGURE S4 (cont) - Probands with multiple novel or rare variants in one gene**

**chr11:92086828&chr11:92624235, Proband 7 – FAT3, L517S&L4544F**

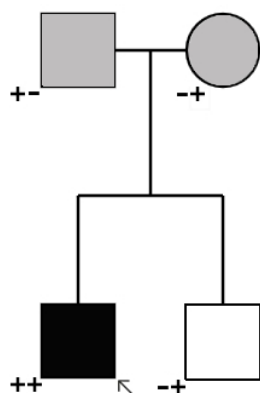

|                | Father | Mother | Proband   | Sib |
|----------------|--------|--------|-----------|-----|
| chr11:92086828 | TC     | TT     | TC        | TT  |
| chr11:92624235 | CC     | CT     | CT        | CT  |
| <b>ELS</b>     |        |        | <b>72</b> | 86  |
| <b>RLS</b>     |        |        | <b>72</b> | 93  |
| <b>NWR</b>     | 104    | 91     | 92        | 103 |
| <b>VIQ</b>     |        |        |           |     |
| <b>PIQ</b>     |        |        | 119       | 119 |

**chr12:49418717&chr12:49432365, Proband 12 – KMT2D, R5266H&A2925V**

Pedigree shown in Figure 3

**chr13:109613971&chr13:109617108, Proband 28 – MYO16, A708T&splice acceptor lost**

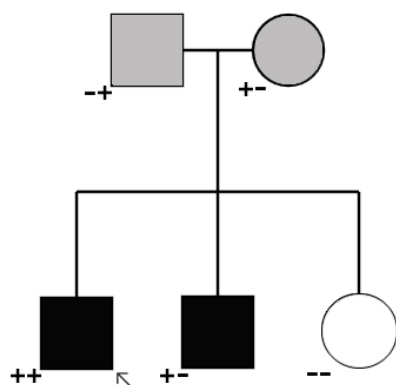

|                 | Father | Mother | Proband   | Sib1      | Sib2 |
|-----------------|--------|--------|-----------|-----------|------|
| chr13:109613971 | GA     | GG     | GA        | GA        | GG   |
| chr13:109617108 | GG     | GA     | GA        | GG        | GG   |
| <b>ELS</b>      |        |        | <b>72</b> | <b>73</b> | 84   |
| <b>RLS</b>      |        |        | <b>76</b> | 85        | 87   |
| <b>NWR</b>      | 94     | 91     | 97        | 105       | 105  |
| <b>VIQ</b>      |        |        |           |           |      |
| <b>PIQ</b>      |        |        |           | 119       |      |

Father self-reports a history of speech and language difficulties

**chr14:58924684&chr14:59014632, Proband 19 – KIAA086, L577I&G1625R**

Pedigree shown in Figure 3

**chr15:42977116& chr15:42981101& chr15:42982237, Proband 12 – STARD9, C1114R&P2442R&V2821L**

Pedigree shown in Figure 3

**chr15:42977810& chr15:42978141& chr15:42981101& chr15:42982237, Proband 19 – STARD9, I1345S&E1455D&P2442R&V2821L**

Pedigree shown in Figure 3



**SUPPLEMENTARY FIGURE S4 (cont) - Probands with multiple novel or rare variants in one gene**

chr16:23635348&chr16:23641275, Proband 13 – *PALB2*, L939W&T734S

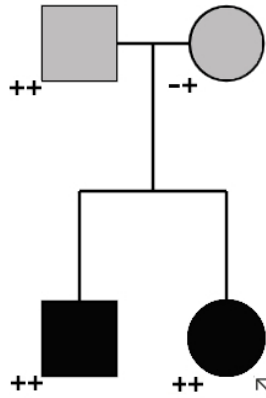

|                | Father | Mother | Sib       | Proband   |
|----------------|--------|--------|-----------|-----------|
| chr16:23635348 | AC     | AA     | AC        | AC        |
| chr16:23641275 | TA     | TA     | TA        | TA        |
| <b>ELS</b>     |        |        | <b>64</b> | <b>73</b> |
| <b>RLS</b>     |        |        | <b>65</b> | <b>85</b> |
| <b>NWR</b>     | 91     | 55     |           | 77        |
| <b>VIQ</b>     |        |        |           |           |
| <b>PIQ</b>     |        |        | 108       | 89        |

chr17:34861135&chr17:34871802, Proband 25 – *MYO19*, splice donor lost &Y149C

Both variants inherited from single parent
